# Supplementary material
Source: HighWire-hosted journal article supplement (https://svn.smart01.highwire.org/content/svn-2023-003029)
Supplement: inline-supplementary-material-2 [file inline-supplementary-material-2.pdf]

### Follow-Up Questionnaire

Participant ID: \_\_\_\_\_

Thank you for participating in our study. It has been a year since you took the initial survey, and we want to assess your feelings towards advance consent have changed. Do you still want to take part in our project?

Your records show that you:

- Have/have not had a stroke event in the last year.
- Provided/did not provide advance consent in the initial survey

#### Have/Have not had a stroke

1. In the past year, have you been approached to participate in a clinical trial?
  - a. Yes
  - b. No
2. In the past year, have you given consent to participate in a clinical trial?
  - a. Yes
  - b. No
3. If you have been asked to give consent, how comfortable did you feel with the process?
  - a. Very comfortable
  - b. Somewhat comfortable
  - c. Neither comfortable or uncomfortable
  - d. Somewhat uncomfortable
  - e. Very uncomfortable

Remember that advance consent is a way for researchers to get a patient's permission to include them in a study before a stroke or other health issue happens that stops them from being able to provide their own permission at the time. It lets patients decide to participate in research when they are feeling well and have had time to think it over and ask questions.

For example, a physician has identified that their patient is at risk of a stroke. She tells the patient about this risk, but she also informs the patient that there is an ongoing clinical trial testing a new treatment that could potentially be beneficial to the patient if, for whatever reason, they do have a stroke within the next year. The physician and patient discuss the details of this clinical trial and ask the patient if they would be interested in enrolling if, as discussed, the patient did later suffer a stroke and become eligible for the trial.

Version Date: 24<sup>th</sup> April 2023

## 4. How much do you agree with each of the following statements?

|                                                                                                                              | Strongly agree | Agree | Neither agree nor disagree | Disagree | Strongly disagree |
|------------------------------------------------------------------------------------------------------------------------------|----------------|-------|----------------------------|----------|-------------------|
| I would give advance consent for participation in an acute stroke trial                                                      |                |       |                            |          |                   |
| If the patient provided advance consent for a trial: I am happy with my decision to provide advance consent                  |                |       |                            |          |                   |
| If the patient provided advance consent for a trial: I would provide advance consent again if I had the opportunity to do so |                |       |                            |          |                   |

5. (If provided advance consent) How difficult was the decision to provide advance consent?
- Very difficult
  - Somewhat difficult
  - Neither difficult nor easy
  - Somewhat easy
  - Very easy
6. Do you have any comments/thoughts about advance consent or this survey? (Free text)

Version Date: 24<sup>th</sup> April 2023
